# Supplementary material
Source: PubMed Central journal article supplement (PMC3837510)
Supplement: supp_blood-2013-08-518886_TableS1.pdf [file supp_blood-2013-08-518886_TableS1.pdf]

| <b>Symbol</b>   | <b>Ensembl gene Id.</b> | <b>NCBI Id.</b> | <b>Position</b> |
|-----------------|-------------------------|-----------------|-----------------|
| <i>ABCA12</i>   | ENSG00000144452         | 26154           | 2q34            |
| <i>ABL1</i>     | ENSG00000097007         | 25              | 9q34.1          |
| <i>ACTR5</i>    | ENSG00000101442         | 79913           | 20q11.23        |
| <i>ARHGAP26</i> | ENSG00000145819         | 23092           | 5q31            |
| <i>ASXL1</i>    | ENSG00000171456         | 171023          | 20q11.1         |
| <i>ATRX</i>     | ENSG00000085224         | 546             | Xq21.1          |
| <i>ATXN7L1</i>  | ENSG00000146776         | 222255          | 7q22.3          |
| <i>BCOR</i>     | ENSG00000183337         | 54880           | Xp11.14         |
| <i>BRAF</i>     | ENSG00000157764         | 673             | 7q34            |
| <i>CBL</i>      | ENSG00000110395         | 867             | 11q23.3         |
| <i>CBLB</i>     | ENSG00000114423         | 868             | 3q13.11         |
| <i>CBLC</i>     | ENSG00000142273         | 23624           | 19q13.2         |
| <i>CD101</i>    | ENSG00000134256         | 9398            | 1p13            |
| <i>CDH1</i>     | ENSG00000039068         | 999             | 16q22.1         |
| <i>CDKN1B</i>   | ENSG00000111276         | 1027            | 12p13.1         |
| <i>CDKN2A</i>   | ENSG00000147889         | 1029            | 9p21            |
| <i>CDKN2B</i>   | ENSG00000147883         | 1030            | 9p21.3          |
| <i>CEBPA</i>    | ENSG00000245848         | 1050            | 19q13.1         |
| <i>CHGA</i>     | ENSG00000100604         | 1113            | 14q32           |
| <i>CREBBP</i>   | ENSG00000005339         | 1387            | 16p13.3         |
| <i>CSF1R</i>    | ENSG00000182578         | 1436            | 5q32            |
| <i>CSF2</i>     | ENSG00000164400         | 1437            | 5q31.1          |
| <i>CTNNA1</i>   | ENSG00000044115         | 1495            | 5q31            |
| <i>CUX1</i>     | ENSG00000160967         | 1523            | 7q22.1          |
| <i>DDX18</i>    | ENSG00000088205         | 8886            | 2q14.1          |
| <i>DNMT1</i>    | ENSG00000130816         | 1786            | 19p13.2         |
| <i>DNMT3A</i>   | ENSG00000119772         | 1788            | 2p23            |
| <i>EGFR</i>     | ENSG00000146648         | 1956            | 7p12            |
| <i>ELF1</i>     | ENSG00000120690         | 1997            | 13q14.11        |
| <i>EP300</i>    | ENSG00000100393         | 2033            | 22q13           |
| <i>ERG</i>      | ENSG00000157554         | 2078            | 21q22.2         |
| <i>ETV6</i>     | ENSG00000139083         | 2120            | 12p13.2         |
| <i>MECOM</i>    | ENSG00000085276         | 2122            | 3q26            |
| <i>EZH2</i>     | ENSG00000106462         | 2146            | 7q35--36        |
| <i>FAM175B</i>  | ENSG00000165660         | 23172           | 10q26.13        |
| <i>FBXW7</i>    | ENSG00000109670         | 55294           | 4q31.3          |
| <i>FLT3</i>     | ENSG00000122025         | 2322            | 13q12           |
| <i>GATA1</i>    | ENSG00000102145         | 2623            | Xp11.23         |
| <i>GATA2</i>    | ENSG00000179348         | 2624            | 3q21.3          |
| <i>GNAS</i>     | ENSG00000087460         | 2778            | 20q13.3         |
| <i>HIPK2</i>    | ENSG00000064393         | 28996           | 7q34            |
| <i>HRAS</i>     | ENSG00000174775         | 3265            | 11p15.5         |
| <i>HMGA2</i>    | ENSG00000149948         | 8091            | 12q15           |
| <i>IDH1</i>     | ENSG00000138413         | 3417            | 2q33.3          |

|                |                 |        |              |
|----------------|-----------------|--------|--------------|
| <i>IDH2</i>    | ENSG00000182054 | 3418   | 15q26.1      |
| <i>IKZF1</i>   | ENSG00000185811 | 10320  | 7p13         |
| <i>INVS</i>    | ENSG00000119509 | 27130  | 9q31         |
| <i>IRF1</i>    | ENSG00000125347 | 3659   | 5q31.1       |
| <i>JAK2</i>    | ENSG00000096968 | 3717   | 9p24         |
| <i>JAK3</i>    | ENSG00000105639 | 3718   | 19p13.1      |
| <i>KDM2B</i>   | ENSG00000089094 | 84678  | 12q24.31     |
| <i>KDM5A</i>   | ENSG00000073614 | 5927   | 12p13.33     |
| <i>KDM6A</i>   | ENSG00000147050 | 7403   | Xp11.2       |
| <i>KIT</i>     | ENSG00000157404 | 3815   | 4q12         |
| <i>KRAS</i>    | ENSG00000133703 | 3845   | 12p12.1      |
| <i>LCORL</i>   | ENSG00000178177 | 254251 | 4p15.31      |
| <i>LILRA3</i>  | ENSG00000170866 | 11026  | 19q13.4      |
| <i>MAP2K5</i>  | ENSG00000137764 | 5607   | 15q23        |
| <i>MECOM</i>   | ENSG00000085276 | 2122   | 3q26         |
| <i>MET</i>     | ENSG00000105976 | 4233   | 7q31         |
| <i>MLL</i>     | ENSG00000118058 | 4297   | 11q23        |
| <i>MLL2</i>    | ENSG00000167548 | 8085   | 12q12        |
| <i>MLL3</i>    | ENSG00000055609 | 58508  | 7q36.1       |
| <i>MLL5</i>    | ENSG00000005483 | 55904  | 7q22.3       |
| <i>MMD2</i>    | ENSG00000136297 | 221938 | 7p22.1       |
| <i>MN1</i>     | ENSG00000169184 | 4330   | 22q12.1      |
| <i>MPL</i>     | ENSG00000117400 | 4352   | 1p34.2       |
| <i>MTAP</i>    | ENSG00000099810 | 4507   | 9p21.3       |
| <i>MYC</i>     | ENSG00000136997 | 4609   | 8q24.21      |
| <i>NF1</i>     | ENSG00000196712 | 4763   | 17q11.2      |
| <i>NLRP1</i>   | ENSG00000091592 | 22861  | 17p13.2      |
| <i>NOTCH1</i>  | ENSG00000148400 | 4851   | 9q34.3       |
| <i>NPM1</i>    | ENSG00000181163 | 4869   | 5q35         |
| <i>NR5A1</i>   | ENSG00000136931 | 2516   | 9q33         |
| <i>NRAS</i>    | ENSG00000213281 | 4893   | 1p13.2       |
| <i>NRD1</i>    | ENSG00000078618 | 4898   | 1p32.2-p32.1 |
| <i>NSD1</i>    | ENSG00000165671 | 64324  | 5q35.2       |
| <i>NUP98</i>   | ENSG00000110713 | 4928   | 11p15.4      |
| <i>OCA2</i>    | ENSG00000104044 | 4948   | 15q12-q13.1  |
| <i>PDGFRA</i>  | ENSG00000134853 | 5156   | 4q12         |
| <i>PHF12</i>   | ENSG00000109118 | 57649  | 17q11.2      |
| <i>PHF6</i>    | ENSG00000156531 | 84295  | Xq26.2       |
| <i>PKP3</i>    | ENSG00000184363 | 11187  | 11p15        |
| <i>PRDX2</i>   | ENSG00000167815 | 7001   | 19p13.2      |
| <i>PRPF40B</i> | ENSG00000110844 | 25766  | 12q13.12     |
| <i>PTEN</i>    | ENSG00000171862 | 5728   | 10q23.3      |
| <i>PTPN11</i>  | ENSG00000179295 | 5781   | 12q24.1      |
| <i>RAD21</i>   | ENSG00000164754 | 5885   | 8q24.11      |
| <i>RAD50</i>   | ENSG00000113522 | 10111  | 5q31.1       |

|                |                 |       |          |
|----------------|-----------------|-------|----------|
| <i>RB1</i>     | ENSG00000139687 | 5925  | 13q14    |
| <i>RINT1</i>   | ENSG00000135249 | 60561 | 7q22.3   |
| <i>RORC</i>    | ENSG00000143365 | 6097  | 1q21     |
| <i>RUNX1</i>   | ENSG00000159216 | 861   | 21q22.3  |
| <i>RUNX1T1</i> | ENSG00000079102 | 862   | 8q22     |
| <i>SF1</i>     | ENSG00000168066 | 7536  | 11q13.1  |
| <i>SF3A1</i>   | ENSG00000099995 | 10291 | 22q12.2  |
| <i>SF3B1</i>   | ENSG00000115524 | 23451 | 2q33.1   |
| <i>SH2B3</i>   | ENSG00000085276 | 10019 | 12q24.12 |
| <i>SOCS1</i>   | ENSG00000185338 | 8651  | 16p13.13 |
| <i>SPI1</i>    | ENSG00000066336 | 6688  | 11p11.2  |
| <i>SRPK2</i>   | ENSG00000135250 | 6733  | 7q22.3   |
| <i>SRSF2</i>   | ENSG00000161547 | 6427  | 17q25.1  |
| <i>STAG2</i>   | ENSG00000101972 | 10735 | Xq25     |
| <i>STK17B</i>  | ENSG00000081320 | 9262  | 2q32.3   |
| <i>TCF4</i>    | ENSG00000196628 | 6925  | 18q21.2  |
| <i>TET1</i>    | ENSG00000138336 | 80312 | 10q21.3  |
| <i>TET2</i>    | ENSG00000168769 | 54790 | 4q24     |
| <i>TP53</i>    | ENSG00000141510 | 7157  | 17p13.1  |
| <i>U2AF1</i>   | ENSG00000160201 | 7307  | 21q22.3  |
| <i>U2AF2</i>   | ENSG00000063244 | 11338 | 19q13.42 |
| <i>WT1</i>     | ENSG00000184937 | 7490  | 1p13     |
| <i>ZEB2</i>    | ENSG00000169554 | 9839  | 2q22.3   |
| <i>ZRSR2</i>   | ENSG00000169249 | 8233  | Xp22.1   |
